# Supplementary material for: Molecular Phylogeny and Morphological Distinctions of Two Popular Bivalves,Ctenoides scaberandCtenoides mitis
Source: Hindawi journal article supplement (doi:10.1155/2017/1624014), 2017-01-01
Supplement: f1 [file 1624014.f1.doc]

**Supplemental Table 1.** Specimen information and Genbank accession numbers of all individuals used in the phylogenetic analyses. Sequences newly generated in this study are highlighted in grey. Where necessary, species names were updated to the currently accepted taxonomy. UF = University of Florida; UCM = University of Colorado Museum of Natural History.

| **Species** | **Museum** | **Catalog Number** | **Location Collected** | **COI** | **28S** | **H3** |
| --- | --- | --- | --- | --- | --- | --- |
| *Acesta bullisi* | N/A | N/A | NA | AM494905 |  |  |
| *Acesta cryptadelphe* | N/A | N/A | NA | KR706468 |  |  |
| *Acesta excavata* | N/A | N/A | NA | AM494911 | KX713355 | KX713509 |
| *Acesta mori* | N/A | N/A | NA | KJ147474 |  |  |
| *Acesta oophaga* | N/A | N/A | NA | AM494902 |  |  |
| *Acesta sphoni* | N/A | N/A | NA | KJ147471 |  |  |
| *Ctenoides ales* | UCM | 48143 | Philippines | MF540379 | MF540417 | MF476209 |
| *Ctenoides annulatus* | N/A | N/A | NA |  | AJ307550 | EU379493 |
| *Ctenoides mitis* | UCM | 48125 | Florida Keys, FL, USA | MF540381 | MF540431 | MF476210 |
| *Ctenoides mitis* | UCM | 48128 | Florida Keys, FL, USA | MF540407 | MF540420 | MF476213 |
| *Ctenoides mitis* | UCM | 48129 | Florida Keys, FL, USA | MF540408 | MF540421 | MF476214 |
| *Ctenoides mitis* | UCM | 48130 | Florida Keys, FL, USA | MF540380 | MF540422 | MF476215 |
| *Ctenoides mitis* | UF | 437400 | Florida Keys, FL, USA | MF540401 | MF540440 | MF476227 |
| *Ctenoides mitis* | UF | 450807 | St. Martin | MF540399 | MF540438 | MF476230 |
| *Ctenoides mitis* | UF | 450948 | St. Martin | MF540402 | MF540434 | MF476231 |
| *Ctenoides mitis* | UF | 437399 | Florida Keys, FL, USA | MF540403 |  | MF476232 |
| *Ctenoides mitis* | UF | 450697 | St. Martin | MF540404 | MF540432 | MF476233 |
| *Ctenoides mitis* | UF | 451313 | St. Martin | MF540405 |  | MF476234 |
| *Ctenoides mitis* | UF | 451591 | St. Martin | MF540406 | MF540435 | MF476235 |
| *Ctenoides mitis* | UF | 411689 | Florida Keys, FL, USA | MF540400 | MF540433 | MF476228 |
| *Ctenoides scaber* | UCM | 48126 | Florida Keys, FL, USA | MF540382 | MF540418 | MF476211 |
| *Ctenoides scaber* | UCM | 48127 | Florida Keys, FL, USA | MF540383 | MF540419 | MF476212 |
| *Ctenoides scaber* | UCM | 48131 | Florida Keys, FL, USA | MF540384 | MF540423 | MF476216 |
| *Ctenoides scaber* | UCM | 48132 | Florida Keys, FL, USA | MF540385 | MF540413 | MF476217 |
| *Ctenoides scaber* | UCM | 48133 | Haiti | MF540386 | MF540414 | MF476218 |
| *Ctenoides scaber* | UCM | 48134 | Haiti | MF540388 | MF540425 | MF476220 |
| *Ctenoides scaber* | UCM | 48135 | Haiti | MF540389 | MF540426 | MF476221 |
| *Ctenoides scaber* | UCM | 48136 | Haiti | MF540390 | MF540415 | MF476222 |
| *Ctenoides scaber* | UCM | 48137 | Haiti | MF540391 | MF540427 | MF476238 |
| *Ctenoides scaber* | UCM | 48138 | Haiti | MF540392 | MF540428 | MF476223 |
| *Ctenoides scaber* | UCM | 48139 | Haiti | MF540393 | MF540416 | MF476224 |
| *Ctenoides scaber* | UCM | 48140 | Haiti | MF540394 | MF540429 | MF476225 |
| *Ctenoides scaber* | UCM | 48141 | Haiti | MF540395 | MF540430 | MF476226 |
| *Ctenoides scaber* | UCM | 48142 | Haiti | MF540387 | MF540424 | MF476219 |
| *Ctenoides scaber* | UF | 505125 | Panama | MF540397 | MF540436 | MF476236 |
| *Ctenoides scaber* | UF | 372445 | Panama | MF540398 | MF540437 | MF476237 |
| *Ctenoides scaber* | UF | 411689 | Florida Keys, FL, USA | MF540396 | MF540439 | MF476229 |
| *Ctenoides sp.* | N/A | N/A | NA | KU496287 |  |  |
| *Lima fujitai* | N/A | N/A | NA | AB076913 | AB102740 |  |
| *Lima lima* | N/A | N/A | NA | KC429101 | KC429434 | KC429174 |
| *Lima loscombi* | N/A | N/A | NA | AM494912 |  |  |
| *Lima pacifica galapagensis* | N/A | N/A | NA | GQ166584 |  |  |
| *Lima sowerbyi* | N/A | N/A | NA |  | HM600749 | HM600736 |

| *Lima zealandica Limaria fragilis*  *Limaria hemphilli* | N/A N/A  N/A | N/A N/A  N/A | NA NA  NA | AB076953 | HM600746 AB102742 | HM600733  KP300487 |
| --- | --- | --- | --- | --- | --- | --- |
| *Limaria hians* | N/A | N/A | NA | AF120650 |  | JQ611556 |
| *Limaria pellucida* | N/A | N/A | NA | KX713474 | KX713396 | EU379503 |
| *Limaria sp.* | UCM | 48144 | Philippines | MF540411 | MF540409 | MF540377 |
| *Limaria sp.* | UCM | 48145 | Philippines | MF540412 | MF540410 | MF540378 |
| *Mytilus edulis* | N/A | N/A | NA | KR084911 | AF339512 |  |
| *Pecten maximus* | N/A | N/A | NA | EU418250 | HM630545 |  |

**Authors:** Dougherty, Lindsey F.1,2 and Li, Jingchun 1,2

**Journal:** Marine Biology

**Title:** Molecular phylogeny and morphological distinctions of two popular bivalves – *Ctenoides scaber* and *Ctenoides mitis.*

**Affiliations**

1. Department of Ecology and Evolutionary Biology University of Colorado Boulder

334 UCB

Boulder, CO 80309 USA

1. Museum of Natural History University of Colorado Boulder 265 UCB

Boulder, CO 80302 USA

**Email of Corresponding author:** [lindsey.dougherty@colorado.edu](mailto:lindsey.dougherty@colorado.edu)
